# Supplementary material
Source: HighWire-hosted journal article supplement (https://cmaj.ca/highwire/filestream/76418/field_highwire_adjunct_files/0/200089-res-1-at.pdf)
Supplement: 200089-res-1-at.pdf [file 200089-res-1-at.pdf]

**Appendix 1 (as supplied by the authors):** Supplementary tables

**Table A1:** Databases used in the current study

| <b>Database</b>                                                          | <b>Abbreviation</b> | <b>Data held</b>                                                                                                   |
|--------------------------------------------------------------------------|---------------------|--------------------------------------------------------------------------------------------------------------------|
| Canadian Institutes of Health Information Discharge Abstract Database    | DAD                 | Demographic and clinical information about all hospital admissions and discharges, including transfers and deaths. |
| National Ambulatory Care Reporting System                                | SDS/NACRS           | Emergency department visits, day surgery and mandated outpatient clinics                                           |
| Ontario Health Insurance Plan database                                   | OHIP                | Physicians claims for services provided                                                                            |
| Ontario Laboratory Information System                                    | OLIS                | Inpatient and outpatient laboratory data                                                                           |
| ---                                                                      | MOMBABY             | Inpatient admission records from the Discharge Abstract Database for mothers and their newborns delivered          |
| Statistics Canada census data                                            | CENSUS              | Income quintile and location of residence (rural v. non-rural) defined according to postal code                    |
| Better Outcomes Registry and Network                                     | BORN                | Information related to maternal, perinatal and newborn health including maternal weight                            |
| Immigration, Refugees and Citizenship Canada Permanent Resident Database | REF                 | Identify maternal world region of origin as a proxy for ethnicity                                                  |
| Registered Persons Database                                              | RPDB                | Individual health card number, date of birth, sex, postal code and death date (where applicable)                   |

**Table A2.** Variables used to define study entry and exclusion criteria, renal function measures, and stratification variables.

| <b>Assessment</b>             | <b>Timing</b>                                     | <b>Disease or procedure or condition</b>                                                                                                                                                          | <b>ICD-10-CA codes</b>                                                                                                                                                                                                                                                         | <b>OHIP ICD-9 diagnostic codes or fee codes {or other source if in parentheses}</b>                                                          | <b>PubMed link to related validation studies for some codes</b> |
|-------------------------------|---------------------------------------------------|---------------------------------------------------------------------------------------------------------------------------------------------------------------------------------------------------|--------------------------------------------------------------------------------------------------------------------------------------------------------------------------------------------------------------------------------------------------------------------------------|----------------------------------------------------------------------------------------------------------------------------------------------|-----------------------------------------------------------------|
| <b>Cohort entry criterion</b> | April 2007 to October 2016                        | All obstetrically delivered mothers and newborns (liveborn or stillborn) in the province of Ontario                                                                                               | Main patient service code indicating “obstetrical delivery” (in MOMBABY: <a href="https://datadictionary.ices.on.ca/Applications/DataDictionary/Library.aspx?Library=MOMBABY">https://datadictionary.ices.on.ca/Applications/DataDictionary/Library.aspx?Library=MOMBABY</a> ) | --                                                                                                                                           |                                                                 |
|                               | March 2007 to December 2015                       | Women who underwent serum creatinine measurement in the 10 weeks prior to conception                                                                                                              | --                                                                                                                                                                                                                                                                             | {OLIS}                                                                                                                                       |                                                                 |
| <b>Exclusion criteria</b>     | At the time of the maternal serum screening       | Woman’s postal code is non-Ontario or she has an invalid OHIP number (M_VALIKN not ‘V’, SEX not ‘F’, BDATE missing, or DTHDATE < serum screening date) or problematic delivery record (WARN^=‘N’) | --                                                                                                                                                                                                                                                                             | {Registered Persons Database (RPDB) contains demographic information and encrypted healthcare numbers for all individuals eligible for OHIP} |                                                                 |
|                               | Same                                              | Maternal age < 16 or > 50 years or unknown                                                                                                                                                        | --                                                                                                                                                                                                                                                                             | {RPDB}                                                                                                                                       |                                                                 |
|                               | At the time of the index delivery hospitalization | Gestational age < 20 weeks or unknown                                                                                                                                                             | M_GESTWKS_DEL < 20 or B_GESTWKS_DEL < 20 in MOMBABY                                                                                                                                                                                                                            | --                                                                                                                                           |                                                                 |
|                               | Same                                              | Multifetal pregnancy                                                                                                                                                                              | M_MULTIBIRTH=‘T’ or B_MULTIBIRTH=‘T’ in MOMBABY                                                                                                                                                                                                                                | --                                                                                                                                           |                                                                 |

**Table A2.** Variables used to define study entry and exclusion criteria, renal function measures, and stratification variables.

| <b>Assessment</b>          | <b>Timing</b>                                                     | <b>Disease or procedure or condition</b>                                   | <b>ICD-10-CA codes</b> | <b>OHIP ICD-9 diagnostic codes or fee codes {or other source if in parentheses}</b>                                                                                          | <b>PubMed link to related validation studies for some codes</b>                     |
|----------------------------|-------------------------------------------------------------------|----------------------------------------------------------------------------|------------------------|------------------------------------------------------------------------------------------------------------------------------------------------------------------------------|-------------------------------------------------------------------------------------|
|                            | Anytime prior to the index pregnancy estimated date of conception | End-stage renal disease (chronic dialysis)                                 | 1PZ21*                 | R849, G323, G325, G326, G860, G862, G865, G863, G866, G330, G331, G332, G333, G861, G082, G083, G085, G090, G091, G092, G093, G094, G095, G096, G294, G295, G864, H540, H740 | <a href="https://pubmed.ncbi.nlm.nih.gov/2288-11-25/">10.1186/1471-2288-11-25</a>   |
|                            | Anytime prior to the index pregnancy estimated date of conception | Kidney transplantation                                                     | 1PC85*                 | S435, S434 {CORR database: treatment code 171; transplanted organ type code: 10,11,12,18,19}                                                                                 | <a href="https://pubmed.ncbi.nlm.nih.gov/015-0054-9/">10.1186/s40697-015-0054-9</a> |
| <b>Main study measures</b> | Within the 10 weeks prior to estimated date of conception         | Abnormal serum creatinine (SCr) > 95 <sup>th</sup> percentile of 77 µmol/L | --                     | {OLIS}                                                                                                                                                                       |                                                                                     |

**Table A2.** Variables used to define study entry and exclusion criteria, renal function measures, and stratification variables.

| Assessment                                                     | Timing                                                                       | Disease or procedure or condition                                                                                       | ICD-10-CA codes                                 | OHIP ICD-9 diagnostic codes or fee codes {or other source if in parentheses}                                                                                                                                                                                                                                      | PubMed link to related validation studies for some codes                                                |
|----------------------------------------------------------------|------------------------------------------------------------------------------|-------------------------------------------------------------------------------------------------------------------------|-------------------------------------------------|-------------------------------------------------------------------------------------------------------------------------------------------------------------------------------------------------------------------------------------------------------------------------------------------------------------------|---------------------------------------------------------------------------------------------------------|
|                                                                | Same                                                                         | Abnormal estimated glomerular filtration rate (eGFR) < 5 <sup>th</sup> percentile of 88 mL/min/1.73 m <sup>2</sup>      | --                                              | {OLIS: Equation provided by: CKD-EPI = 141 x min (Scr/κ, 1) <sup>α</sup> x max(Scr/κ, 1)-1.209 x 0.993Age x 1.018 x 1.159 [if origin is African or Caribbean**]; κ = 0.7 for females, α = -0.329 for females, min = the minimum of Scr/κ or 1, max = the maximum of Scr/κ or 1 **See World region of origin below |                                                                                                         |
| <b>Identification of the chronic kidney disease sub-cohort</b> | Up to 4 years before the estimated date of conception of the index pregnancy | - Outpatient albumin to creatinine ratio > 2.0<br>- Dipstick positive proteinuria                                       | --                                              | {OLIS: 14959-1, 30000-4, 32294-1}<br>{OLIS: 5804-0, 50561-0}                                                                                                                                                                                                                                                      |                                                                                                         |
|                                                                | Up to 4 years before the estimated date of conception of the index pregnancy | Chronic kidney disease (identified either by ICD-10-CA or OHIP codes, or an OLIS eGFR < 60 mL/min/1.73 m <sup>2</sup> ) | E102, E112, E132, E142, I12, I13, N08, N18, N19 | 403, 585<br>{OLIS: 14682-9, 14959-1, 30000-4, 32294-1}                                                                                                                                                                                                                                                            | <a href="https://www.ncbi.nlm.nih.gov/pubmed/23560464">https://www.ncbi.nlm.nih.gov/pubmed/23560464</a> |

**Table A2.** Variables used to define study entry and exclusion criteria, renal function measures, and stratification variables.

| <b>Assessment</b>     | <b>Timing</b>                                                                | <b>Disease or procedure or condition</b>                                                                                                        | <b>ICD-10-CA codes</b>                                                                                                     | <b>OHIP ICD-9 diagnostic codes or fee codes {or other source if in parentheses}</b> | <b>PubMed link to related validation studies for some codes</b>                                                                                                                                                                                                                                             |
|-----------------------|------------------------------------------------------------------------------|-------------------------------------------------------------------------------------------------------------------------------------------------|----------------------------------------------------------------------------------------------------------------------------|-------------------------------------------------------------------------------------|-------------------------------------------------------------------------------------------------------------------------------------------------------------------------------------------------------------------------------------------------------------------------------------------------------------|
|                       | Up to 4 years before the estimated date of conception of the index pregnancy | Acute kidney injury                                                                                                                             | N17                                                                                                                        |                                                                                     | <a href="https://pubmed.ncbi.nlm.nih.gov/2012-001821/">10.1136/bmjopen-2012-001821</a>                                                                                                                                                                                                                      |
|                       | Up to 4 years before the estimated date of conception of the index pregnancy | Hypertensive disorder of pregnancy                                                                                                              | O11, O13, O14, O15, O16                                                                                                    | 642                                                                                 | <a href="https://pubmed.ncbi.nlm.nih.gov/1093/aje/kwm139/">10.1093/aje/kwm139</a> ;<br><a href="https://pubmed.ncbi.nlm.nih.gov/101016/ajog.2005.08.058/">10.1016/j.ajog.2005.08.058</a>                                                                                                                    |
| <b>Study outcomes</b> | At the time of the index delivery hospitalization                            | Preterm live birth < 37 completed weeks' gestation                                                                                              | B_GESTWKS_DEL < 37 in MOMBABY (if missing use M_GESTWKS_DEL)                                                               | --                                                                                  | <a href="https://www.ncbi.nlm.nih.gov/pubmed/?term=Validation+of+perinatal+data+in+the+Discharge+Abstract+Database+of+the+Canadian+Institute+for+Health">https://www.ncbi.nlm.nih.gov/pubmed/?term=Validation+of+perinatal+data+in+the+Discharge+Abstract+Database+of+the+Canadian+Institute+for+Health</a> |
|                       | Same                                                                         | Provider-initiated preterm live birth < 37 weeks: 1) PTB and 2) absence of preterm spontaneous labour and 3) presence of c-section or induction | 1) Preterm live birth < 37 weeks (see above); and 2) absence of O601, O602, O42, O756; and 3) presence of 5MD60* or 5AC30* | --                                                                                  | <a href="https://www.ncbi.nlm.nih.gov/pubmed/28646095">https://www.ncbi.nlm.nih.gov/pubmed/28646095</a>                                                                                                                                                                                                     |
|                       | Same                                                                         | Spontaneous preterm live birth < 37 weeks                                                                                                       | Preterm live birth < 37 weeks and not provider-initiated (see above)                                                       | --                                                                                  |                                                                                                                                                                                                                                                                                                             |
|                       | Same                                                                         | Preterm live birth < 32 completed weeks' gestation                                                                                              | B_GESTWKS_DEL < 32 in MOMBABY (if missing use M_GESTWKS_DEL)                                                               | --                                                                                  |                                                                                                                                                                                                                                                                                                             |

**Table A2.** Variables used to define study entry and exclusion criteria, renal function measures, and stratification variables.

| <b>Assessment</b> | <b>Timing</b>                                         | <b>Disease or procedure or condition</b>                                  | <b>ICD-10-CA codes</b>                       | <b>OHIP ICD-9 diagnostic codes or fee codes {or other source if in parentheses}</b> | <b>PubMed link to related validation studies for some codes</b>                                         |
|-------------------|-------------------------------------------------------|---------------------------------------------------------------------------|----------------------------------------------|-------------------------------------------------------------------------------------|---------------------------------------------------------------------------------------------------------|
|                   | Same                                                  | Preeclampsia or eclampsia                                                 | O11, O14, O15                                | --                                                                                  | <a href="https://www.ncbi.nlm.nih.gov/pubmed/19527567">https://www.ncbi.nlm.nih.gov/pubmed/19527567</a> |
|                   | Same                                                  | Severe small for gestational age birthweight < 5 <sup>th</sup> percentile | B_GESTWKS_DEL, B_WEIGHT and B_SEX in MOMBABY | --                                                                                  | <a href="https://www.ncbi.nlm.nih.gov/pubmed/29117948">https://www.ncbi.nlm.nih.gov/pubmed/29117948</a> |
|                   | Same                                                  | Stillbirth                                                                | M_STILLBIRTH='T' in MOMBABY                  | --                                                                                  |                                                                                                         |
| <b>Covariates</b> | At the time of the index conception                   | Maternal age                                                              | --                                           | RPDB                                                                                |                                                                                                         |
|                   | At the time of SCr measurement                        | World region of origin                                                    | --                                           | {IRCC Permanent Resident Database: COUNTRY_BIRTH }                                  | <a href="https://www.ncbi.nlm.nih.gov/pubmed/25384653">https://www.ncbi.nlm.nih.gov/pubmed/25384653</a> |
|                   | Same                                                  | Maternal area-level income Quintile                                       | --                                           | {Statistics Canada census data}                                                     |                                                                                                         |
|                   | Same                                                  | Maternal rural residence                                                  | --                                           | {Statistics Canada census data}                                                     |                                                                                                         |
|                   | Same (recorded at the index delivery hospitalization) | Parity                                                                    | PREVBIRTH in MOMBABY                         | --                                                                                  |                                                                                                         |

**Table A2.** Variables used to define study entry and exclusion criteria, renal function measures, and stratification variables.

| Assessment | Timing                                                                       | Disease or procedure or condition | ICD-10-CA codes                                             | OHIP ICD-9 diagnostic codes or fee codes {or other source if in parentheses}                                                           | PubMed link to related validation studies for some codes                                                |
|------------|------------------------------------------------------------------------------|-----------------------------------|-------------------------------------------------------------|----------------------------------------------------------------------------------------------------------------------------------------|---------------------------------------------------------------------------------------------------------|
|            | Same (recorded at the index delivery hospitalization)                        | Maternal Weight                   | --                                                          | {BORN: MATWGKKG (Niday link on M_KEY) or PRE_PREG_MATERNAL_WT_KG (BIS, AGG_PREGNANCY, link on M_IKN and B_BDATE/M_ADMDATE +/- 7 days)} |                                                                                                         |
|            | Up to 4 years before the estimated date of conception of the index pregnancy | Pre-pregnancy diabetes mellitus   | E10, E11, E13, E14, O244                                    | 250                                                                                                                                    | <a href="https://www.ncbi.nlm.nih.gov/pubmed/11874939">https://www.ncbi.nlm.nih.gov/pubmed/11874939</a> |
|            | Same                                                                         | Chronic hypertension              | I10, I15, O10, O11                                          | 401                                                                                                                                    | <a href="https://www.ncbi.nlm.nih.gov/pubmed/19858407">https://www.ncbi.nlm.nih.gov/pubmed/19858407</a> |
|            | Same                                                                         | Drug-dependence or tobacco use    | F10-F19, F55, G312, O354, O355, T51, T652, Z720, Z721, Z722 | 291, 292, 303, 304, 305                                                                                                                |                                                                                                         |

**Table A2.** Variables used to define study entry and exclusion criteria, renal function measures, and stratification variables.

| <b>Assessment</b> | <b>Timing</b>                                                                                                                                                                 | <b>Disease or procedure or condition</b>                                                                             | <b>ICD-10-CA codes</b> | <b>OHIP ICD-9 diagnostic codes or fee codes {or other source if in parentheses}</b> | <b>PubMed link to related validation studies for some codes</b> |
|-------------------|-------------------------------------------------------------------------------------------------------------------------------------------------------------------------------|----------------------------------------------------------------------------------------------------------------------|------------------------|-------------------------------------------------------------------------------------|-----------------------------------------------------------------|
|                   | Up to 4 years before the estimated date of conception of the index pregnancy (and only used as additional covariates in analyses among the chronic kidney disease sub-cohort) | Prior proteinuric renal disease<br>- Outpatient albumin to creatinine ratio > 2.0<br>- Dipstick positive proteinuria | --                     | {OLIS: 14959-1, 30000-4, 32294-1}<br>{OLIS: 5804-0, 50561-0}                        |                                                                 |

\*Indicates coding by Canadian Classification of Interventions (corresponding to ICD-10-CA years)

BORN: Better Outcomes Registry & Network; CORR: Canadian Organ Replacement Registry; ICD-9: International Classification of Diseases, 9th Revision; ICD-10-CA: International Classification of Diseases, 10th Revision, Canada; IRCC: Immigration, Refugees and Citizenship Canada; OHIP: Ontario Health Insurance Plan; OLIS: Ontario Laboratories Information System
